# Supplementary material for: Be Direct! Restaurant Social Media Posts to Drive Customer Engagement in Times of Crisis and Beyond
Source: MDPI journal article supplement (doi:10.3390/tourhosp5020020), 2024-04-09
Supplement: s1 [file s1]

Archive with 2 entries (2 files):
- tourismhosp-2924748-supplementary table S1.pdf
- tourismhosp-2924748-supplementary table S2.pdf
