# Supplementary material for: Be Direct! Restaurant Social Media Posts to Drive Customer Engagement in Times of Crisis and Beyond
Source: MDPI journal article supplement (doi:10.3390/tourhosp5020020), 2024-04-09
Supplement: s1 [file s1 › tourismhosp-2924748-supplementary table S1.pdf]

**Supplementary Table S1.** The five periods under study, differentiated by the intensity of the COVID-19 pandemic and sanitary restrictions.

| Period |                     | COVID cases                       | Comments                                                                                                                                                                                                                                                       |
|--------|---------------------|-----------------------------------|----------------------------------------------------------------------------------------------------------------------------------------------------------------------------------------------------------------------------------------------------------------|
| 1      | January 1-31, 2020  | None reported                     | Dining rooms opened (reference period).                                                                                                                                                                                                                        |
| 2      | April 1-30, 2020    | First reports at the end of March | Dining rooms closed. Pick-up at take-out counters and delivery services maintained.                                                                                                                                                                            |
| 3      | July 1-31, 2020     | Decreasing                        | Dining rooms opened, but with a limit of 10 people from up to three different addresses, sitting at tables at least 2 meters apart and separated by plastic barriers.                                                                                          |
| 4      | October 1-31, 2020  | Increasing                        | PR in the yellow zone (pre-alert), i.e., dining rooms opened at 50% capacity, and mandatory to keep a register of customers. GM in the red zone (maximum alert), i.e., gatherings prohibited in private homes and in indoor public places such as restaurants. |
| 5      | September 1-30 2021 | Decreasing                        | Opening hours extended and capacity increased, but only customers with vaccination proof allowed.                                                                                                                                                              |
