# Supplementary material for: Be Direct! Restaurant Social Media Posts to Drive Customer Engagement in Times of Crisis and Beyond
Source: MDPI journal article supplement (doi:10.3390/tourhosp5020020), 2024-04-09
Supplement: s1 [file s1 › tourismhosp-2924748-supplementary table S2.pdf]

**Supplementary Table S2.** Data summary for the sampled restaurants.

| Restaurant | Independent/<br>National<br>brand | Number of<br>subscribers | Total posts | Total<br>reactions | Reactions/<br>post | Engagement<br>rate | Main verbal<br>move(s) | Emojis/<br>post |
|------------|-----------------------------------|--------------------------|-------------|--------------------|--------------------|--------------------|------------------------|-----------------|
| PR1        | Brand                             | 589                      | 2           | 0                  | 0                  | 0.00%              | AD                     | 0               |
| PR2        | Brand                             | 814                      | 56          | 8 950              | 160                | 15.76%             | DE                     | 2.9             |
| PR3        | Independent                       | 8 889                    | 66          | 11 383             | 172                | 1.89%              | AE                     | 1.2             |
| PR4        | Independent                       | 3 531                    | 24          | 1 175              | 49                 | 1.36%              | AE; DE                 | 1.3             |
| PR5        | Brand                             | 6 254                    | 33          | 3 696              | 112                | 1.74%              | AE                     | 2.3             |
| PR6        | Independent                       | 2 879                    | 94          | 847                | 9                  | 0.30%              | A                      | 0.3             |
| PR7        | Independent                       | 3 375                    | 12          | 438                | 37                 | 1.04%              | A                      | 0.4             |
| PR8        | Independent                       | 6 251                    | 12          | 818                | 68                 | 1.07%              | A; AE                  | 0.3             |
| GM1        | Brand                             | 3 471                    | 17          | 1 052              | 62                 | 1.80%              | A                      | 8.8             |
| GM2        | Brand                             | 709                      | 69          | 3 462              | 50                 | 6.19%              | DE                     | 2.8             |
| GM3        | Independent                       | 5 812                    | 9           | 853                | 95                 | 1.52%              | A; AE; D               | 1.3             |
| GM4        | Brand                             | 1 059                    | 52          | 8 317              | 160                | 14.93%             | DE                     | 2.7             |
| GM5        | Brand                             | 2 436                    | 90          | 36 083             | 401                | 15.80%             | AE                     | 2.7             |
| GM6        | Brand                             | 520                      | 45          | 996                | 22                 | 4.18%              | DE                     | 2.0             |
| GM7        | Brand                             | 1 598                    | 47          | 1 184              | 25                 | 1.58%              | AE                     | 3.3             |
| GM8        | Brand                             | 371                      | 11          | 97                 | 9                  | 1.96%              | AE                     | 3.5             |
